# Supplementary material for: Virulence test using nematodes to prescreen Nocardia species capable of inducing neurodegeneration and behavioral disorders
Source: PeerJ. 2017 Oct 10;5:e3823. doi: 10.7717/peerj.3823 (PMC5639870; doi:10.7717/peerj.3823)
Supplement: Data S2 [file peerj-05-3823-s004.xls]

## Sheet: Medium culture 
		Date		2013-03-25				Operator	Claire & Jérémy
		Supernatant			Medium culture control			Stade de vers
		P: Present		A: Abscent
	worm	CEP1	CEP2	CEP3	CEP4	ADE1	ADE2	Neuronal body appearance	Appearance of axons
	1	P	P	P	P	P	P	Normal	Uniform and continuous
	2	P	P	P	P	P	P	Normal	Uniform and continuous
	3	P	P	P	P	P	P	Normal	Uniform and continuous
	4	P	P	P	P	P	P	Normal	Uniform and continuous
	5	P	P	P	P	P	P	Normal	Uniform and continuous
	6	P	P	P	P	P	P	Normal	Uniform and continuous
	7	P	P	P	P	P	P	Normal	Uniform and continuous
	8	P	P	P	P	P	P	Normal	Uniform and continuous
	9	P	P	P	P	P	P	Normal	Uniform and continuous
	10	P	P	P	P	P	P	Normal	Uniform and continuous
	11	P	P	P	P	P	P	Normal	Uniform and continuous
	12	P	P	P	P	P	P	Normal	Uniform and continuous
	13	P	P	P	P	P	P	Normal	Uniform and continuous
	14	P	P	P	P	P	P	Normal	Uniform and continuous
	15	P	P	P	P	P	P	Normal	Uniform and continuous
	16	P	P	P	P	P	P	Normal	Uniform and continuous
	17	P	P	P	P	P	P	Normal	Uniform and continuous
	18	P	P	P	P	P	P	Normal	Uniform and continuous
	19	P	P	P	P	P	P	Normal	Uniform and continuous
	20	P	P	P	P	P	P	Normal	Uniform and continuous
	21	P	P	P	P	P	P	Normal	Uniform and continuous
	22	P	P	P	P	P	P	Normal	Uniform and continuous
	23	P	P	P	P	P	P	Normal	blebbing
	24	P	P	P	P	P	P	Normal	Uniform and continuous
	25	P	P	P	P	P	P	Normal	Uniform and continuous
	26	P	P	P	P	P	P	Normal	Uniform and continuous
	27	P	P	A	A	A	P	Cell body rounding	blebbing
	28	P	P	P	P	P	P	Normal	Uniform and continuous
	29	P	P	P	P	P	P	Normal	Uniform and continuous

## Sheet: Nematode culture
		Date		2013-03-25				Operator	Claire & Jérémy
		Supernatant			Nematode culture control
		P: Present		A: Abscent
	worm	CEP1	CEP2	CEP3	CEP4	ADE1	ADE2	Neuronal body appearance	Appearance of axons
	1	P	P	P	P	P	P	Normal	Uniform and continuous
	2	P	P	P	P	P	P	Normal	Uniform and continuous
	3	P	P	P	P	P	P	Normal	Uniform and continuous
	4	P	P	P	P	P	P	Normal	Uniform and continuous
	5	P	P	P	A	P	P	Normal	blebbing
	6	P	P	P	P	P	P	Normal	Uniform and continuous
	7	P	P	P	P	P	P	Normal	Uniform and continuous
	8	P	P	P	P	P	P	Normal	Uniform and continuous
	9	P	P	P	P	P	P	Normal	Uniform and continuous
	10	P	P	P	P	P	P	Normal	Uniform and continuous
	11	P	P	P	P	P	P	Normal	Uniform and continuous
	12	P	P	P	P	P	P	Normal	Uniform and continuous
	13	P	P	P	P	P	P	Normal	Uniform and continuous
	14	P	P	P	P	P	P	Normal	Uniform and continuous
	15	P	P	P	P	P	P	Normal	Uniform and continuous
	16	P	P	P	P	P	P	Normal	Uniform and continuous
	17	P	P	P	P	P	P	Normal	Uniform and continuous
	18	P	P	P	P	P	P	Normal	Uniform and continuous
	19	P	P	P	P	P	P	Normal	Uniform and continuous
	20	P	P	P	P	P	P	Normal	Uniform and continuous
	21	P	P	P	P	P	P	Normal	Uniform and continuous
	22	P	P	P	P	P	P	Normal	Uniform and continuous
	23	P	P	P	P	P	P	Normal	Uniform and continuous
	24	P	P	P	P	P	P	Normal	Uniform and continuous
	25	P	P	P	P	P	P	Normal	Uniform and continuous
	26	P	P	P	P	P	P	Normal	Uniform and continuous
	27	P	P	P	P	P	P	Normal	Uniform and continuous
	28	P	P	P	P	P	P	Normal	Uniform and continuous
	29	P	P	P	P	P	P	Normal	Uniform and continuous
	30	P	P	P	P	P	P	Normal	Uniform and continuous

## Sheet: DSM 44484
		Date		2013-04-08				Operator	Claire & Jérémy
		Supernatant			N.cyriacigeorgica DSM 44484			Stade de vers
		P: Present		A: Abscent
	worm	CEP1	CEP2	CEP3	CEP4	ADE1	ADE2	Neuronal body appearance	Appearance of axons
	1	P	P	P	P	P	P	Normal	Uniform and continuous
	2	P	P	P	P	P	P	Normal	Uniform and continuous
	3	P	P	P	P	P	P	Normal	Uniform and continuous
	4	P	P	P	P	P	P	Normal	Uniform and continuous
	5	P	P	P	P	P	P	Normal	Uniform and continuous
	6	P	P	P	P	P	P	Normal	Uniform and continuous
	7	P	P	P	P	P	P	Normal	Uniform and continuous
	8	P	P	P	P	P	P	Normal	Uniform and continuous
	9	P	P	P	P	P	P	Normal	Uniform and continuous
	10	P	P	P	P	P	P	Normal	Uniform and continuous
	11	P	P	P	P	P	P	Normal	Uniform and continuous
	12	P	P	P	P	P	P	Normal	Uniform and continuous
	13	P	P	P	P	P	P	Normal	Uniform and continuous
	14	P	P	P	P	P	P	Normal	Uniform and continuous
	15	P	P	P	P	P	P	Normal	blebbing
	16	P	P	P	P	P	P	Normal	Uniform and continuous
	17	P	P	P	P	P	P	Normal	Uniform and continuous
	18	P	P	P	P	P	P	Normal	Uniform and continuous
	19	P	P	P	P	P	P	Normal	Uniform and continuous
	20	P	P	P	P	P	P	Normal	Uniform and continuous
	21	P	P	P	P	P	P	Normal	Uniform and continuous
	22	P	P	P	P	P	P	Cell body rounding	blebbing
	23	P	P	P	P	P	P	Normal	Uniform and continuous
	24	P	P	P	P	P	P	Normal	Uniform and continuous
	25	P	P	P	P	P	P	Normal	Uniform and continuous
	26	P	P	P	P	P	P	Normal	Uniform and continuous
	27	P	P	P	P	P	P	Normal	Uniform and continuous
	28	P	P	P	P	P	P	Cell body rounding	blebbing
	29	P	P	P	A	P	P	Normal	blebbing
	30	P	P	P	P	P	P	Normal	Uniform and continuous

## Sheet: 04.107
		Date		2013-04-29				Operator	Claire & Jérémy
		Supernatant			N.cyriacigeorgica 04.107			Stade de vers
		P: Present		A: Abscent
	worm	CEP1	CEP2	CEP3	CEP4	ADE1	ADE2	Neuronal body appearance	Appearance of axons
	1	P	P	P	P	P	P	Normal	Uniform and continuous
	2	P	P	P	P	P	P	Normal	Uniform and continuous
	3	P	P	P	P	P	P	Normal	Uniform and continuous
	4	P	P	P	P	P	P	Normal	Uniform and continuous
	5	P	P	P	P	P	P	Normal	Uniform and continuous
	6	P	P	P	P	P	P	Normal	Uniform and continuous
	7	P	P	P	P	P	P	Normal	Uniform and continuous
	8	P	P	P	P	P	P	Normal	Uniform and continuous
	9	P	P	P	P	P	P	Normal	Uniform and continuous
	10	P	P	P	P	P	P	Normal	Uniform and continuous
	11	P	P	P	P	P	P	Normal	Uniform and continuous
	12	P	P	P	P	P	P	Normal	Uniform and continuous
	13	P	P	P	P	P	P	Normal	Uniform and continuous
	14	P	P	P	P	P	P	Normal	Uniform and continuous
	15	P	P	P	P	P	P	Normal	Uniform and continuous
	16	P	P	P	P	P	P	Normal	Uniform and continuous
	17	P	P	P	P	P	P	Normal	blebbing
	18	P	P	P	P	P	P	Normal	Uniform and continuous
	19	P	P	P	P	P	P	Normal	Uniform and continuous
	20	P	P	P	P	P	P	Normal	Uniform and continuous
	21	P	P	P	P	P	P	Normal	Uniform and continuous
	22	P	P	P	P	P	P	Normal	Uniform and continuous
	23	P	P	P	P	P	P	Normal	Uniform and continuous
	24	P	P	P	P	P	P	Normal	blebbing
	25	P	P	P	P	P	P	Normal	blebbing
	26	P	P	P	P	P	P	Normal	blebbing
	27	P	P	P	P	P	P	Normal	blebbing
	28	P	P	P	P	P	P	Normal	Uniform and continuous
	29	P	P	P	P	P	P	Normal	Uniform and continuous
	30	P	P	P	P	P	P	Normal	Uniform and continuous

## Sheet: ATCC19247
		Date		2013-04-22				Operator	Claire & Jérémy
		Supernatant			N.asteroides ATCC19247			Stade de vers
		P: Present		A: Abscent
	worm	CEP1	CEP2	CEP3	CEP4	ADE1	ADE2	Neuronal body appearance	Appearance of axons
	1	P	P	P	P	P	P	Normal	Uniform and continuous
	2	P	P	P	P	P	P	Normal	blebbing
	3	P	P	P	P	P	P	Normal	blebbing
	4	P	P	P	P	P	P	Normal	Uniform and continuous
	5	P	P	P	P	P	P	Cell body rounding	blebbing
	6	P	P	P	P	P	P	Normal	Uniform and continuous
	7	P	P	P	P	P	P	Normal	Uniform and continuous
	8	P	P	P	P	P	P	Normal	Uniform and continuous
	9	P	P	P	P	P	P	Normal	Uniform and continuous
	10	P	P	P	P	P	P	Normal	Uniform and continuous
	11	P	P	P	P	P	P	Normal	Uniform and continuous
	12	P	P	P	P	P	P	Normal	Uniform and continuous
	13	P	P	P	P	P	P	Normal	blebbing
	14	P	P	P	P	P	P	Normal	blebbing
	15	P	P	P	P	P	P	Normal	Uniform and continuous
	16	P	P	P	P	P	P	Normal	Uniform and continuous
	17	P	P	P	P	P	P	Normal	blebbing
	18	P	P	P	P	P	P	Normal	Uniform and continuous
	19	P	P	P	P	P	P	Normal	Uniform and continuous
	20	P	P	P	P	P	P	Normal	Uniform and continuous
	21	P	P	P	P	P	P	Normal	Uniform and continuous
	22	P	P	P	P	P	P	Cell body rounding	blebbing
	23	P	P	P	P	P	P	Normal	Uniform and continuous
	24	P	P	P	P	P	P	Normal	blebbing
	25	P	P	P	P	P	P	Normal	Uniform and continuous
	26	P	P	P	P	P	P	Normal	Uniform and continuous
	27	P	P	P	P	P	P	Normal	Uniform and continuous
	28	P	P	P	P	P	P	Normal	Uniform and continuous
	29	P	P	P	P	P	P	Normal	Uniform and continuous
	30	P	P	P	P	P	P	Normal	Uniform and continuous
	31	P	P	P	P	P	P	Normal	Uniform and continuous

## Sheet:  N27
		Date		2013-04-29				Operator	Claire & Jérémy
		Supernatant			N.cyriacigeorgica N27			Stade de vers
		P: Present		A: Abscent
	worm	CEP1	CEP2	CEP3	CEP4	ADE1	ADE2	Neuronal body appearance	Appearance of axons
	1	P	P	P	P	P	P	Normal	Uniform and continuous
	2	P	P	P	P	P	P	Normal	Uniform and continuous
	3	P	P	P	P	P	P	Normal	Uniform and continuous
	4	P	P	P	P	P	P	Normal	Uniform and continuous
	5	P	P	P	P	P	P	Normal	Uniform and continuous
	6	P	P	P	P	P	P	Normal	Uniform and continuous
	7	P	P	P	P	P	P	Cell body rounding	Uniform and continuous
	8	P	P	P	P	P	P	Normal	Uniform and continuous
	9	P	P	P	P	P	P	Normal	Uniform and continuous
	10	P	P	P	P	P	P	Cell body rounding	blebbing
	11	P	P	P	P	P	P	Normal	Uniform and continuous
	12	P	P	P	P	P	P	Normal	Uniform and continuous
	13	P	P	P	P	P	P	Normal	Uniform and continuous
	14	P	P	P	P	P	P	Normal	Uniform and continuous
	15	P	P	P	P	P	P	Normal	Uniform and continuous
	16	P	P	P	P	P	P	Normal	Uniform and continuous
	17	P	P	P	P	P	P	Normal	Uniform and continuous
	18	P	P	P	P	P	P	Normal	blebbing
	19	P	P	P	P	P	P	Normal	blebbing
	20	P	P	P	P	P	P	Cell body rounding	blebbing
	21	P	P	P	P	P	P	Normal	Uniform and continuous
	22	P	P	P	P	P	P	Normal	blebbing
	23	P	P	P	P	P	P	Normal	Uniform and continuous
	24	P	P	P	P	P	P	Cell body rounding	blebbing
	25	P	P	P	P	P	P	Normal	blebbing
	26	P	P	P	P	P	P	Normal	Uniform and continuous
	27	P	P	P	P	P	P	Normal	Uniform and continuous
	28	P	P	P	P	P	P	Normal	blebbing
	29	P	P	P	P	P	P	Normal	Uniform and continuous
	30	P	P	P	P	P	P	Cell body rounding	blebbing

## Sheet: GUH-2
		Date		2013-03-25				Operator	Claire & Jérémy
		Supernatant			N.cyriacigeorgica GUH-2			Stade de vers
		P: Present		A: Abscent
	worm	CEP1	CEP2	CEP3	CEP4	ADE1	ADE2	Neuronal body appearance	Appearance of axons
	1	P	P	P	P	P	P	Cell body rounding	blebbing
	2	P	P	P	P	P	P	Normal	Uniform and continuous
	3	P	P	P	P	P	P	Cell body rounding	blebbing
	4	P	P	P	P	P	P	Normal	Uniform and continuous
	5	P	P	P	P	P	P	Normal	Uniform and continuous
	6	P	P	P	P	P	P	Normal	Uniform and continuous
	7	P	P	A	A	P	P	Cell body rounding	blebbing
	8	P	P	P	P	P	P	Normal	Uniform and continuous
	9	P	P	P	P	P	P	Normal	Uniform and continuous
	10	P	P	P	P	P	P	Normal	Uniform and continuous
	11	P	P	P	P	P	P	Normal	Uniform and continuous
	12	P	P	P	P	P	P	Normal	Uniform and continuous
	13	P	P	P	P	P	P	Normal	Uniform and continuous
	14	P	P	P	P	P	P	Normal	Uniform and continuous
	15	P	P	P	P	P	P	Cell body rounding	blebbing
	16	P	P	P	P	P	P	Normal	Uniform and continuous
	17	P	P	P	P	P	P	Cell body rounding	Uniform and continuous
	18	P	P	P	P	P	P	Normal	Uniform and continuous
	19	P	P	P	P	P	P	Normal	Uniform and continuous
	20	P	P	P	P	P	P	Normal	blebbing
	21	P	P	P	P	P	P	Cell body rounding	blebbing
	22	P	P	P	P	P	P	Normal	Uniform and continuous
	23	P	P	P	P	P	P	Cell body rounding	Uniform and continuous
	24	P	P	P	P	P	P	Normal	Uniform and continuous
	25	P	P	P	P	P	P	Normal	blebbing
	26	P	P	P	P	P	P	Normal	Uniform and continuous
	27	P	P	P	P	P	P	Normal	Uniform and continuous
	28	P	P	P	P	P	P	Normal	blebbing
	29	P	P	P	P	P	P	Cell body rounding	blebbing
	30	P	P	P	P	P	P	Normal	Uniform and continuous

## Sheet: IFM 10152
		Date		2013-04-08				Operator	Claire & Jérémy
		Supernatant			N.farcinica IFM 10152			Stade de vers
		P: Present		A: Abscent
	worm	CEP1	CEP2	CEP3	CEP4	ADE1	ADE2	Neuronal body appearance	Appearance of axons
	1	P	P	P	P	P	P	Cell body rounding	blebbing
	2	P	P	P	P	P	P	Normal	blebbing
	3	P	P	A	A	P	P	Normal	blebbing
	4	P	P	P	P	P	P	Normal	blebbing
	5	P	P	P	A	P	P	Cell body rounding	blebbing
	6	P	P	P	P	P	P	Normal	blebbing
	7	P	P	P	P	P	A	Cell body rounding	blebbing
	8	P	P	P	P	P	P	Cell body rounding	blebbing
	9	P	P	P	P	P	P	Normal	Uniform and continuous
	10	P	P	P	P	P	P	Normal	Uniform and continuous
	11	P	P	P	P	P	P	Normal	Uniform and continuous
	12	P	P	P	P	P	P	Normal	Uniform and continuous
	13	P	P	P	P	P	P	Normal	Uniform and continuous
	14	P	P	P	P	P	P	Cell body rounding	Uniform and continuous
	15	P	P	P	P	P	P	Normal	Uniform and continuous
	16	P	P	P	P	P	P	Normal	Uniform and continuous
	17	P	P	P	P	P	P	Cell body rounding	Uniform and continuous
	18	P	P	P	P	P	P	Normal	Uniform and continuous
	19	P	P	P	P	P	P	Cell body rounding	Uniform and continuous
	20	P	P	P	P	P	P	Normal	Uniform and continuous
	21	P	P	P	P	P	P	Normal	Uniform and continuous
	22	P	P	P	P	P	P	Cell body rounding	Uniform and continuous
	23	P	P	P	P	P	P	Normal	Uniform and continuous
	24	P	P	P	P	P	P	Cell body rounding	Uniform and continuous
	25	P	P	P	P	P	P	Cell body rounding	blebbing
	26	P	P	P	P	P	P	Normal	Uniform and continuous
	27	P	P	P	P	P	P	Normal	Uniform and continuous
	28	P	P	P	P	P	P	Cell body rounding	blebbing
	29	P	P	P	P	P	P	Normal	Uniform and continuous
	30	P	P	P	P	P	P	Normal	Uniform and continuous
	31	P	P	P	P	P	P	Normal	blebbing
	32	P	P	P	P	P	A	Cell body rounding	blebbing

## Sheet: 04.100
		Date		2013-04-22				Operator	Claire & Jérémy
		Supernatant			N.cyriacigeorgica 04.100			Stade de vers
		P: Present		A: Abscent
	worm	CEP1	CEP2	CEP3	CEP4	ADE1	ADE2	Neuronal body appearance	Appearance of axons
	1	P	P	P	P	P	P	Normal	Uniform and continuous
	2	P	P	P	P	P	P	Normal	Uniform and continuous
	3	P	P	P	P	P	P	Normal	Uniform and continuous
	4	P	P	P	P	P	P	Normal	Uniform and continuous
	5	P	P	P	P	P	P	Normal	blebbing
	6	P	P	P	P	P	P	Normal	Uniform and continuous
	7	P	P	P	P	P	P	Cell body rounding	Uniform and continuous
	8	P	P	P	P	P	P	Normal	Uniform and continuous
	9	P	P	P	P	P	P	Normal	blebbing
	10	P	P	P	P	P	P	Normal	blebbing
	11	P	P	P	P	P	P	Normal	blebbing
	12	P	P	P	P	P	P	Normal	blebbing
	13	P	P	P	P	P	P	Normal	blebbing
	14	P	P	P	P	P	P	Normal	blebbing
	15	P	P	P	P	P	P	Normal	Uniform and continuous
	16	P	P	P	P	P	P	Normal	Uniform and continuous
	17	P	P	P	P	P	P	Normal	Uniform and continuous
	18	P	P	P	P	P	P	Normal	Uniform and continuous
	19	P	P	P	P	P	P	Normal	Uniform and continuous
	20	P	P	P	P	P	P	Normal	Uniform and continuous
	21	P	P	P	P	P	P	Normal	Uniform and continuous
	22	P	P	P	P	P	P	Normal	Uniform and continuous
	23	P	P	P	P	P	P	Normal	Uniform and continuous
	24	P	P	P	P	P	P	Cell body rounding	Uniform and continuous
	25	P	P	P	P	P	P	Normal	Uniform and continuous
	26	P	P	P	P	P	P	Normal	Uniform and continuous
	27	P	P	P	P	P	P	Normal	Uniform and continuous
	28	P	P	P	P	P	P	Normal	Uniform and continuous
	29	P	P	P	P	P	P	Normal	Uniform and continuous
	30	P	P	P	P	P	P	Normal	Uniform and continuous
